# Supplementary material for: Pictorial methods to assess heavy menstrual bleeding in research and clinical practice: a systematic literature review
Source: Springer Nature journal article supplement (doi:10.1186/s12905-020-0887-y), 2020-02-10
Supplement: MOESM2 [file 17666810]

**Additional file 2. The QUADAS questionnaire for the quality assessment of diagnostic accuracy studies**

| Item ( <i>characteristic tested</i> )                                                                                    | Higham<br>[29] | Deeny<br>[30] | Janssen<br>[31] | Barr [32] | Reid<br>[33] | Wyatt<br>[34] | Zakherah<br>[37] | Larsen<br>[36] | Magnay<br>[5] |
|--------------------------------------------------------------------------------------------------------------------------|----------------|---------------|-----------------|-----------|--------------|---------------|------------------|----------------|---------------|
| 1. Representative spectrum of <i>patients (spectrum composition)</i>                                                     | X              | √             | √               | X         | X            | √             | √                | √              | √             |
| 2. Clear selection criteria described ( <i>selection criteria</i> )                                                      | √              | √             | √               | √         | √            | √             | √                | √              | √             |
| 3. Correct diagnostic classification by reference test ( <i>reference standard</i> )                                     | √              | √             | √               | √         | √            | √             | √                | √              | √             |
| 4. Short enough interval between index & reference test ( <i>disease progression bias</i> )                              | √              | √             | √               | √         | √            | √             | √                | √              | √             |
| 5. Verification of diagnosis using reference test ( <i>partial verification</i> )                                        | √              | √             | √               | √         | √            | √             | √                | √              | √             |
| 6. Same reference test used for all patients ( <i>differential verification</i> )                                        | √              | √             | √               | √         | √            | √             | √                | √              | √             |
| 7. Independent index & reference tests ( <i>incorporation bias</i> )                                                     | √              | √             | √               | √         | √            | √             | √                | √              | √             |
| 8. Sufficient description of index test ( <i>index test execution</i> )                                                  | √              | √             | √               | X         | √            | √             | √                | √              | √             |
| 9. Sufficient description of reference test ( <i>reference standard execution</i> )                                      | √              | √             | √               | √         | X            | √             | X                | X              | √             |
| 10. Index test results without knowledge of reference results ( <i>test review bias</i> )                                | U              | U             | U               | U         | U            | U             | U                | U              | √             |
| 11. Reference test results without knowledge of index test results ( <i>reference review bias</i> )                      | U              | U             | U               | U         | U            | U             | U                | U              | √             |
| 12. Same clinical data available before interpretation of both index and reference tests ( <i>clinical review bias</i> ) | U              | U             | U               | U         | U            | U             | U                | U              | √             |
| 13. Uninterpretable or intermediate test results reported ( <i>uninterpretable test results</i> )                        | N/A            | N/A           | N/A             | N/A       | √            | N/A           | N/A              | N/A            | N/A           |

|                                                             |   |     |   |   |     |   |   |     |   |
|-------------------------------------------------------------|---|-----|---|---|-----|---|---|-----|---|
| 14. Withdrawals from study explained ( <i>withdrawals</i> ) | √ | N/A | √ | √ | N/A | √ | √ | N/A | √ |
|-------------------------------------------------------------|---|-----|---|---|-----|---|---|-----|---|

Questionnaire adapted from Whiting et al (2006). A tick (√) indicates “yes”, X indicates “no”, “U” indicates “unclear” and N/A indicates “not applicable to study”. Whiting PF, Weswood ME, Rutjes AW, Reitsma JB, Bossuyt PN, Kleijnen J. Evaluation of QUADAS, a tool for the quality assessment of diagnostic accuracy studies. BMC Medical Research Methodology 2006;6:9
